# Supplementary material for: Understanding the role of household hygiene practices and foodborne disease risks in child stunting: a UKRI GCRF Action Against Stunting Hub protocol paper
Source: PubMed Central journal article supplement (PMC10900323; doi:10.1136/bmjpo-2022-001695), 2024-02-27
Supplement: bmjpo-2022-001695supp001.pdf [file bmjpo-2022-001695supp001.pdf]

**APPENDIX 1: WASH AND FOOD SAFETY QUESTIONNAIRE**

This questionnaire is administered by trained enumerators to mothers at 3 different time points, to elicit information about food safety and water and sanitation and hygiene practices at home, particularly in relation to infant and young child feeding. Data are collected in tablets on CommCare.

|                                                                                                                                      |
|--------------------------------------------------------------------------------------------------------------------------------------|
| <b># WATER SANITATION *(3 TIMES AT 3RD TRIMESTER, 3 &amp; 24 MO)*</b>                                                                |
| <b>ws_1. What is the main source of drinking water for members of your household?</b>                                                |
| Piped water piped to dwelling                                                                                                        |
| Piped water piped to compound yard or plot                                                                                           |
| Piped water piped to neighbor                                                                                                        |
| Public tap / tapstand                                                                                                                |
| Borehole or tubewell                                                                                                                 |
| Protected well                                                                                                                       |
| Unprotected well                                                                                                                     |
| Protected spring                                                                                                                     |
| Unprotected spring                                                                                                                   |
| Rainwater                                                                                                                            |
| Delivered watertanker or truck                                                                                                       |
| Delivered watersmall cart with tank drum                                                                                             |
| Water kiosk                                                                                                                          |
| Packaged waterbottled water                                                                                                          |
| Packaged watersachet water                                                                                                           |
| Surface water                                                                                                                        |
| Other: specify                                                                                                                       |
| <i>ws_1_96x. Other: specify</i>                                                                                                      |
| <b>ws_2. What is the main source of water used by members of this household for other purposes, such as cooking and handwashing?</b> |
| Piped water piped to dwelling                                                                                                        |
| Piped water piped to compound yard or plot                                                                                           |
| Piped water piped to neighbor                                                                                                        |
| Public tap / tapstand                                                                                                                |
| Borehole or tubewell                                                                                                                 |
| Protected well                                                                                                                       |
| Unprotected well                                                                                                                     |
| Protected spring                                                                                                                     |
| Unprotected spring                                                                                                                   |
| Rainwater                                                                                                                            |
| Delivered watertanker or truck                                                                                                       |
| Delivered watersmall cart with tank drum                                                                                             |
| Water kiosk                                                                                                                          |
| Packaged waterbottled water                                                                                                          |
| Packaged watersachet water                                                                                                           |
| Surface water                                                                                                                        |
| Other: specify                                                                                                                       |
| <i>ws_2_96x. Other: specify</i>                                                                                                      |
| <b>ws_3. Where is this water collected from?</b>                                                                                     |
| In own dwelling                                                                                                                      |

|                                                                                                                                                                                                                                                                                                                                      |
|--------------------------------------------------------------------------------------------------------------------------------------------------------------------------------------------------------------------------------------------------------------------------------------------------------------------------------------|
| In own yard                                                                                                                                                                                                                                                                                                                          |
| Elsewhere                                                                                                                                                                                                                                                                                                                            |
| <b>ws_4. How many minutes in total does it take you to go fetch water from this source and come back? (Fill in X minutes)</b>                                                                                                                                                                                                        |
| <b>ws_5. Do you store drinking water in your home?</b>                                                                                                                                                                                                                                                                               |
| Yes                                                                                                                                                                                                                                                                                                                                  |
| No                                                                                                                                                                                                                                                                                                                                   |
| <b>ws_6. Where do you store your drinking water?</b>                                                                                                                                                                                                                                                                                 |
| In a container with a lid/top on it                                                                                                                                                                                                                                                                                                  |
| In an open container                                                                                                                                                                                                                                                                                                                 |
| Container on the roof                                                                                                                                                                                                                                                                                                                |
| <b>ws_7. In the last 4 weeks/month, how frequently did you or anyone in your household worry you would not have enough water for all of your household needs?</b>                                                                                                                                                                    |
| Never (0 times)                                                                                                                                                                                                                                                                                                                      |
| Rarely (1-2 times)                                                                                                                                                                                                                                                                                                                   |
| Sometimes (3-10 times)                                                                                                                                                                                                                                                                                                               |
| Often (11-20times)                                                                                                                                                                                                                                                                                                                   |
| Always (more than 20 times)                                                                                                                                                                                                                                                                                                          |
| <b>ws_8. In the last 4 weeks/month, how frequently has your main water source been interrupted or limited (eg water pressure, less water than expected, river dried up)?</b>                                                                                                                                                         |
| Never (0 times)                                                                                                                                                                                                                                                                                                                      |
| Rarely (1-2 times)                                                                                                                                                                                                                                                                                                                   |
| Sometimes (3-10 times)                                                                                                                                                                                                                                                                                                               |
| Often (11-20times)                                                                                                                                                                                                                                                                                                                   |
| Always (more than 20 times)                                                                                                                                                                                                                                                                                                          |
| <b>ws_9. In the last 4 weeks/month, how frequently has there not been enough water to wash clothes?</b>                                                                                                                                                                                                                              |
| Never (0 times)                                                                                                                                                                                                                                                                                                                      |
| Rarely (1-2 times)                                                                                                                                                                                                                                                                                                                   |
| Sometimes (3-10 times)                                                                                                                                                                                                                                                                                                               |
| Often (11-20times)                                                                                                                                                                                                                                                                                                                   |
| Always (more than 20 times)                                                                                                                                                                                                                                                                                                          |
| <b>ws_10. In the last 4 weeks/month, how frequently have you or anyone in your household had to change schedules or plans due to problems with your water situation? Activities that may have been interrupted include caring for others, doing household chores, agricultural work, income-generating activities, sleeping, etc</b> |
| Never (0 times)                                                                                                                                                                                                                                                                                                                      |
| Rarely (1-2 times)                                                                                                                                                                                                                                                                                                                   |
| Sometimes (3-10 times)                                                                                                                                                                                                                                                                                                               |
| Often (11-20times)                                                                                                                                                                                                                                                                                                                   |
| Always (more than 20 times)                                                                                                                                                                                                                                                                                                          |
| <b>ws_11. In the last 4 weeks/month, how frequently have you or anyone in your household had to change what was being eaten because there were problems with water (eg, for washing foods, cooking, etc)?</b>                                                                                                                        |
| Never (0 times)                                                                                                                                                                                                                                                                                                                      |
| Rarely (1-2 times)                                                                                                                                                                                                                                                                                                                   |
| Sometimes (3-10 times)                                                                                                                                                                                                                                                                                                               |
| Often (11-20times)                                                                                                                                                                                                                                                                                                                   |
| Always (more than 20 times)                                                                                                                                                                                                                                                                                                          |

|                                                                                                                                                                                                                                                |
|------------------------------------------------------------------------------------------------------------------------------------------------------------------------------------------------------------------------------------------------|
| <b>ws_12. In the last 4 weeks/month, how frequently have you or anyone in your household had to go without washing hands after dirty activities (eg, defecating or changing diapers, cleaning animal dung) because of problems with water?</b> |
| Never (0 times)                                                                                                                                                                                                                                |
| Rarely (1-2 times)                                                                                                                                                                                                                             |
| Sometimes (3-10 times)                                                                                                                                                                                                                         |
| Often (11-20times)                                                                                                                                                                                                                             |
| Always (more than 20 times)                                                                                                                                                                                                                    |
| <b>ws_13. In the last 4 weeks/month, how frequently have you or anyone in your household had to go without washing their body because of problems with water (eg, not enough water, dirty, unsafe)?</b>                                        |
| Never (0 times)                                                                                                                                                                                                                                |
| Rarely (1-2 times)                                                                                                                                                                                                                             |
| Sometimes (3-10 times)                                                                                                                                                                                                                         |
| Often (11-20times)                                                                                                                                                                                                                             |
| Always (more than 20 times)                                                                                                                                                                                                                    |
| <b>ws_14. In the last 4 weeks/month, how frequently has there not been as much water to drink as you would like for you or anyone in your household?</b>                                                                                       |
| Never (0 times)                                                                                                                                                                                                                                |
| Rarely (1-2 times)                                                                                                                                                                                                                             |
| Sometimes (3-10 times)                                                                                                                                                                                                                         |
| Often (11-20times)                                                                                                                                                                                                                             |
| Always (more than 20 times)                                                                                                                                                                                                                    |
| <b>ws_15. In the last 4 weeks/month, how frequently did you or anyone in your household feel angry about your water situation?</b>                                                                                                             |
| Never (0 times)                                                                                                                                                                                                                                |
| Rarely (1-2 times)                                                                                                                                                                                                                             |
| Sometimes (3-10 times)                                                                                                                                                                                                                         |
| Often (11-20times)                                                                                                                                                                                                                             |
| Always (more than 20 times)                                                                                                                                                                                                                    |
| <b>ws_16. In the last 4 weeks/month, how frequently have you or anyone in your household gone to sleep thirsty because there wasn't any water to drink?</b>                                                                                    |
| Never (0 times)                                                                                                                                                                                                                                |
| Rarely (1-2 times)                                                                                                                                                                                                                             |
| Sometimes (3-10 times)                                                                                                                                                                                                                         |
| Often (11-20times)                                                                                                                                                                                                                             |
| Always (more than 20 times)                                                                                                                                                                                                                    |
| <b>ws_17. In the last 4 weeks/month, how frequently has there been no useable or drinkable water whatsoever in your household?</b>                                                                                                             |
| Never (0 times)                                                                                                                                                                                                                                |
| Rarely (1-2 times)                                                                                                                                                                                                                             |
| Sometimes (3-10 times)                                                                                                                                                                                                                         |
| Often (11-20times)                                                                                                                                                                                                                             |
| Always (more than 20 times)                                                                                                                                                                                                                    |
| <b>ws_18. In the last 4 weeks/month, how frequently have problems with water caused you or anyone in your household to feel ashamed/excluded/stigmatized?</b>                                                                                  |
| Never (0 times)                                                                                                                                                                                                                                |
| Rarely (1-2 times)                                                                                                                                                                                                                             |
| Sometimes (3-10 times)                                                                                                                                                                                                                         |
| Often (11-20times)                                                                                                                                                                                                                             |

|                                                                                                                                                          |
|----------------------------------------------------------------------------------------------------------------------------------------------------------|
| Always (more than 20 times)                                                                                                                              |
| <b>ws_19. Is there a latrine or toilet that members of this household use regularly?</b>                                                                 |
| Yes                                                                                                                                                      |
| No                                                                                                                                                       |
| <b>ws_20. Where is this toilet facility located?</b>                                                                                                     |
| In own dwelling                                                                                                                                          |
| In own yard or plot                                                                                                                                      |
| Elsewhere                                                                                                                                                |
| <b>ws_21. How many households other than your own share this facility?</b>                                                                               |
| Enter the enumerator Name                                                                                                                                |
|                                                                                                                                                          |
| <b>fh_1. Is there a designated place for handwashing in the household?</b>                                                                               |
| Yes                                                                                                                                                      |
| No                                                                                                                                                       |
| <b>fh_2. How often is soap available at this location?</b>                                                                                               |
| Always                                                                                                                                                   |
| Sometimes                                                                                                                                                |
| Never                                                                                                                                                    |
| <b>fh_3. What were all of the times when you washed your hands (Circle all that apply but do not prompt After each response, ask "any other times?")</b> |
| After defecating                                                                                                                                         |
| After cleaning a child/wiping a child's bottom                                                                                                           |
| After changing a babies nappy                                                                                                                            |
| Before preparing food                                                                                                                                    |
| Before eating                                                                                                                                            |
| Before feeding the child                                                                                                                                 |
| After touching animals                                                                                                                                   |
| After touching animal faeces                                                                                                                             |
| After handling raw animal source foods                                                                                                                   |
| After crop farming activities                                                                                                                            |
| Other                                                                                                                                                    |
| Cannot remember/does not know                                                                                                                            |
| <i>fh_3_96x. Specify other</i>                                                                                                                           |
| <b>FOOD STORAGE</b>                                                                                                                                      |
| <b>fh_4. Do you store meat and meat products (except dried meat)?</b>                                                                                    |
| Yes                                                                                                                                                      |
| No                                                                                                                                                       |
| <b>fh_4a. Where do you store raw meat (fresh/chilled/frozen)?</b>                                                                                        |
| In a fridge                                                                                                                                              |
| In a freezer                                                                                                                                             |
| Covered in a cool room (below 5 degrees Celsius)                                                                                                         |
| Uncovered in a cool room (below 5 degrees Celsius)                                                                                                       |
| Covered in a room at room temperature                                                                                                                    |
| Uncovered in a room at room temperature                                                                                                                  |
| Other, specify                                                                                                                                           |
| <i>fh_4a_96x. Other, specify</i>                                                                                                                         |
| <b>fh_4b. How long do you store the meat and meat products?</b>                                                                                          |
| less than 2 hours                                                                                                                                        |

|                                                                                                           |
|-----------------------------------------------------------------------------------------------------------|
| 2 hours to 5 hours                                                                                        |
| 5 hours to 12 hours                                                                                       |
| 12 hours                                                                                                  |
| 1-3 days                                                                                                  |
| 3-7 days                                                                                                  |
| 1 week                                                                                                    |
| 1 month                                                                                                   |
| <b>fh_4c. Where do you store processed meat (ready-to-cook and ready-to-eat)?</b>                         |
| In a fridge                                                                                               |
| In a freezer                                                                                              |
| Covered in a cool room (below 5 degrees Celsius)                                                          |
| Uncovered in a cool room (below 5 degrees Celsius)                                                        |
| Covered in a room at room temperature                                                                     |
| Uncovered in a room at room temperature                                                                   |
| Other, specify                                                                                            |
| <i>fh_4c_96x. Other, specify</i>                                                                          |
| <b>fh_4d. How long do you store the meat and meat products?</b>                                           |
| less than 2 hours                                                                                         |
| 2 hours to 5 hours                                                                                        |
| 5 hours to 12 hours                                                                                       |
| 12 hours                                                                                                  |
| 1-3 days                                                                                                  |
| 3-7 days                                                                                                  |
| 1 week                                                                                                    |
| 1 month                                                                                                   |
| <b>fh_5. Do you store milk and milk products (except milk powder, evaporated milk or condensed milk)?</b> |
| Yes                                                                                                       |
| No                                                                                                        |
| <b>fh_5a. Where do you store liquid milk (including pasteurized and non-pasteurized)?</b>                 |
| In a fridge                                                                                               |
| In a freezer                                                                                              |
| Covered in a cool room (below 5 degrees Celsius)                                                          |
| Uncovered in a cool room (below 5 degrees Celsius)                                                        |
| Covered in a room at room temperature                                                                     |
| Uncovered in a room at room temperature                                                                   |
| Other, specify                                                                                            |
| <i>fh_5a_96x. Other, specify</i>                                                                          |
| <b>fh_5b. Where do you store solid/semi solid dairy/milk products (e.g cheese, yoghurt, ghee, etc)?</b>   |
| In a fridge                                                                                               |
| In a freezer                                                                                              |
| Covered in a cool room (below 5 degrees Celsius)                                                          |
| Uncovered in a cool room (below 5 degrees Celsius)                                                        |
| Covered in a room at room temperature                                                                     |
| Uncovered in a room at room temperature                                                                   |
| Other, specify                                                                                            |
| <i>fh_5b_96x. Other, specify</i>                                                                          |
| <b>fh_6. Do you store raw or cooked vegetables and fruits?</b>                                            |

|                                                                                                     |
|-----------------------------------------------------------------------------------------------------|
| Yes                                                                                                 |
| No                                                                                                  |
| <b>fh_6a. Where do you store raw vegetables?</b>                                                    |
| In a fridge                                                                                         |
| In a freezer                                                                                        |
| Covered in a cool room (below 5 degrees Celsius)                                                    |
| Uncovered in a cool room (below 5 degrees Celsius)                                                  |
| Covered in a room at room temperature                                                               |
| Uncovered in a room at room temperature                                                             |
| Other, specify                                                                                      |
| <i>fh_6a_96x. Other, specify</i>                                                                    |
| <b>fh_6b. Where do you store cooked vegetables and fruit?</b>                                       |
| In a fridge                                                                                         |
| In a freezer                                                                                        |
| Covered in a cool room (below 5 degrees Celsius)                                                    |
| Uncovered in a cool room (below 5 degrees Celsius)                                                  |
| Covered in a room at room temperature                                                               |
| Uncovered in a room at room temperature                                                             |
| Other, specify                                                                                      |
| <i>fh_6b_96x. Other, specify</i>                                                                    |
| <b>fh_7. Do you store food that has been prepared for your child to give it to the child later?</b> |
| Yes                                                                                                 |
| No                                                                                                  |
| <b>fh_7a. How do you store food that has been prepared for your child?</b>                          |
| Thermos                                                                                             |
| Jug                                                                                                 |
| Plate or bowl (covered)                                                                             |
| Plate or bowl (uncovered)                                                                           |
| Cooking pot (covered)                                                                               |
| Cooking pot (uncovered)                                                                             |
| Other container (covered)                                                                           |
| Other container (uncovered)                                                                         |
| Other, specify                                                                                      |
| <i>fh_7a_96x. Other, specify</i>                                                                    |
| <b>fh_7b. Where do you store this food?</b>                                                         |
| In a fridge                                                                                         |
| In a freezer                                                                                        |
| In a cool room (below 5 degrees Celsius)                                                            |
| In a room at room temperature                                                                       |
| Other, specify                                                                                      |
| <i>fh_7b_96x. Other, specify</i>                                                                    |
| <b>How long do you store this food?</b>                                                             |
| less than 1 hour                                                                                    |
| 1-2 hours                                                                                           |
| 2 hours to 5 hours                                                                                  |
| 5 hours to 12 hours                                                                                 |
| 12 hours                                                                                            |

|                                                                                                                                         |
|-----------------------------------------------------------------------------------------------------------------------------------------|
| 1-3 days                                                                                                                                |
| 3-7 days                                                                                                                                |
| Longer than a week                                                                                                                      |
| Animals                                                                                                                                 |
| <b>fh_8. Does your household keep any animals inside or outside the house you are looking after (i.e. not taken care of by others)?</b> |
| Yes                                                                                                                                     |
| No                                                                                                                                      |
| <b>fh_9. What type of animals?</b>                                                                                                      |
| Chickens                                                                                                                                |
| Ducks                                                                                                                                   |
| Other birds                                                                                                                             |
| Dogs                                                                                                                                    |
| Cats                                                                                                                                    |
| Goats                                                                                                                                   |
| Sheep                                                                                                                                   |
| Pigs                                                                                                                                    |
| Cows                                                                                                                                    |
| Fish                                                                                                                                    |
| Other animals, specify                                                                                                                  |
| <i>fh_9_96x. Other: specify</i>                                                                                                         |
| <b>fh_10. Which of these animals are in the patio, veranda or house any time of the day?</b>                                            |
| None                                                                                                                                    |
| Chickens                                                                                                                                |
| Ducks                                                                                                                                   |
| Other birds                                                                                                                             |
| Dogs                                                                                                                                    |
| Cats                                                                                                                                    |
| Goats                                                                                                                                   |
| Sheeps                                                                                                                                  |
| Pigs                                                                                                                                    |
| Cows                                                                                                                                    |
| Other animals, specify                                                                                                                  |
| <i>fh_10_96x. Other: specify</i>                                                                                                        |
| <b>fh_10a. Is the animal contained in some form of enclosure?</b>                                                                       |
| Yes                                                                                                                                     |
| No                                                                                                                                      |
| <b>fh_10b. Can the child be in contact with the animals or their faeces?</b>                                                            |
| Yes                                                                                                                                     |
| No                                                                                                                                      |
| <b>fh_10c. Can the animal be in contact with food for the child?</b>                                                                    |
| Yes                                                                                                                                     |
| No                                                                                                                                      |
| <b>ASF1_1. What is the first priority ASF consumed by the child most recently? Select [ASF1]</b>                                        |
| Chicken                                                                                                                                 |
| fish                                                                                                                                    |
| beef                                                                                                                                    |
| egg                                                                                                                                     |

|                                                                                                                                       |
|---------------------------------------------------------------------------------------------------------------------------------------|
| squid                                                                                                                                 |
| meat ball                                                                                                                             |
| beef soup                                                                                                                             |
| chicken soup                                                                                                                          |
| duck egg                                                                                                                              |
| fish egg                                                                                                                              |
| None                                                                                                                                  |
| <b>ASF1_2. How was this [ASF] packaged when you got it from the source? (select all that apply)</b>                                   |
| No packaging                                                                                                                          |
| Sealed package                                                                                                                        |
| Washable container (plastic, glass, steel), open                                                                                      |
| Washable container (plastic, glass, steel), closed                                                                                    |
| Plastic bag                                                                                                                           |
| Newspaper                                                                                                                             |
| Other paper                                                                                                                           |
| Aluminium foil                                                                                                                        |
| Other foil                                                                                                                            |
| Container made from natural materials                                                                                                 |
| Other, specify                                                                                                                        |
| <i>ASF1_2_96x. ASF_2_96x Other: specify</i>                                                                                           |
| <b>ASF1_3. Did you transport this [ASF] after you got it?</b>                                                                         |
| <b>No transport means that they either produced it themselves or the ASF was brought to them (e.g. by a trader or neighbour, etc)</b> |
| Yes                                                                                                                                   |
| No                                                                                                                                    |
| <b>ASF1_3a. How long did you transport the ASF for (to take it home)?</b>                                                             |
| less than 5 minutes                                                                                                                   |
| 5 min to 15 min                                                                                                                       |
| 15 to 30 min                                                                                                                          |
| 30 min to 1 hour                                                                                                                      |
| 1hour to 2 hours                                                                                                                      |
| 2 hours to 3 hours                                                                                                                    |
| 3 hours                                                                                                                               |
| <b>ASF1_3b. How did you transport this [ASF] after you got it?</b>                                                                    |
| Chilled (e.g. on ice)                                                                                                                 |
| At ambient temperature                                                                                                                |
| Kept warm (e.g. thermos or thermal food container)                                                                                    |
| Other, specify                                                                                                                        |
| <i>ASF1_3b_96x. Other, specify</i>                                                                                                    |
| <b>ASF1_4. Did you store this [ASF] before preparation?</b>                                                                           |
| Yes                                                                                                                                   |
| No                                                                                                                                    |
| <b>ASF1_4a. Was this [ASF] covered when you stored it before preparation?</b>                                                         |
| Yes                                                                                                                                   |
| No                                                                                                                                    |
| <b>ASF1_4b. Where did you store this [ASF] before preparation?</b>                                                                    |
| In a fridge                                                                                                                           |
| In a freezer                                                                                                                          |

|                                                                                                                        |
|------------------------------------------------------------------------------------------------------------------------|
| In a cool room (below 5 degrees Celsius)                                                                               |
| In a room at room temperature                                                                                          |
| Other, specify                                                                                                         |
| <i>ASF1_4b_96x. Specify, other</i>                                                                                     |
| <b>ASF1_4c. How long was this [ASF] stored before preparing?</b>                                                       |
| minute                                                                                                                 |
| hour                                                                                                                   |
| day                                                                                                                    |
| total minutes                                                                                                          |
| total hours                                                                                                            |
| total day                                                                                                              |
| <b>ASF1_5. Did you wash this [ASF] before preparation?</b>                                                             |
| Yes                                                                                                                    |
| No                                                                                                                     |
| Not applicable                                                                                                         |
| <b>ASF1_6. If yes, why did you wash this [ASF]? (multiple answers)</b>                                                 |
| To remove visible dirt                                                                                                 |
| To remove visible blood                                                                                                |
| To make it safer                                                                                                       |
| Because it is a good practice                                                                                          |
| Other, specify                                                                                                         |
| <i>ASF1_6_96x. Specify, other</i>                                                                                      |
| <b>ASF1_7. Did you chop or cut this [ASF] product before preparation?</b>                                              |
| Yes                                                                                                                    |
| No                                                                                                                     |
| Not applicable                                                                                                         |
| <b>ASF1_8. If yes, which tool(s) did you use to chop or cut this [ASF]? (multiple answers)</b>                         |
| Cutting board                                                                                                          |
| Plate                                                                                                                  |
| Knife                                                                                                                  |
| Other, specify                                                                                                         |
| <i>ASF1_8_96x. Specify, other</i>                                                                                      |
| <b>ASF1_9. How did you prepare this food for the child?</b>                                                            |
| Grilling                                                                                                               |
| Baking                                                                                                                 |
| Frying                                                                                                                 |
| Boiling                                                                                                                |
| Stewing                                                                                                                |
| Simmering                                                                                                              |
| Fermenting                                                                                                             |
| Heating                                                                                                                |
| Mixed in with other ingredients without cooking the ASF (e.g. mixing yoghurt with fruit or adding dried fish to salad) |
| Made smaller portion (e.g. cutting in pieces or butting in a bowl), but did not cook or mix with other ingredients     |
| Other, specify                                                                                                         |
| <i>ASF1_9_96x. Specify, other</i>                                                                                      |
| <b>ASF1_10. For how long was this [ASF] cooked?</b>                                                                    |

|                                                                                                     |
|-----------------------------------------------------------------------------------------------------|
| 1-5 min                                                                                             |
| 5-15 min                                                                                            |
| 15-30 min                                                                                           |
| 30-60 min                                                                                           |
| More than 1 hour                                                                                    |
| <b>ASF1_11. After preparation, was this [ASF] stored before giving it to the child?</b>             |
| Yes                                                                                                 |
| No                                                                                                  |
| <b>ASF1_12. After preparation, how long was this [ASF] stored before giving it to the child?</b>    |
| 1-5 min                                                                                             |
| 5-15 min                                                                                            |
| 15-30 min                                                                                           |
| 30-60 min                                                                                           |
| More than 1 hour, less than 24h                                                                     |
| More than 1 day, less than 2 days                                                                   |
| More than 2 days                                                                                    |
| <b>ASF1_13. How did you store this [ASF] that had been prepared for your child?</b>                 |
| Thermos                                                                                             |
| Jug                                                                                                 |
| Plate or bowl (covered)                                                                             |
| Plate or bowl (uncovered)                                                                           |
| Cooking pot (covered)                                                                               |
| Cooking pot (uncovered)                                                                             |
| Other container (covered)                                                                           |
| Other container (uncovered)                                                                         |
| Other, specify                                                                                      |
| <i>ASF1_13_96x. Specify, other</i>                                                                  |
| <b>ASF1_14. Where did you store this [ASF]?</b>                                                     |
| In a fridge                                                                                         |
| In a freezer                                                                                        |
| In a cool room (below 5 degrees Celsius)                                                            |
| In a room at room temperature                                                                       |
| Other, specify                                                                                      |
| <i>ASF1_14_96x. Specify other</i>                                                                   |
| <b>ASF2_1. What is the second priority ASF consumed by the child most recently? Select [ASF1]</b>   |
| Chicken                                                                                             |
| fish                                                                                                |
| beef                                                                                                |
| egg                                                                                                 |
| squid                                                                                               |
| meat ball                                                                                           |
| beef soup                                                                                           |
| chicken soup                                                                                        |
| duck egg                                                                                            |
| fish egg                                                                                            |
| None                                                                                                |
| <b>ASF2_2. How was this [ASF] packaged when you got it from the source? (select all that apply)</b> |

|                                                                                                                                       |
|---------------------------------------------------------------------------------------------------------------------------------------|
| No packaging                                                                                                                          |
| Sealed package                                                                                                                        |
| Washable container (plastic, glass, steel), open                                                                                      |
| Washable container (plastic, glass, steel), closed                                                                                    |
| Plastic bag                                                                                                                           |
| Newspaper                                                                                                                             |
| Other paper                                                                                                                           |
| Aluminium foil                                                                                                                        |
| Other foil                                                                                                                            |
| Container made from natural materials                                                                                                 |
| Other, specify                                                                                                                        |
| ASF_2_96x Other: specify                                                                                                              |
| <b>ASF2_3. Did you transport this [ASF] after you got it?</b>                                                                         |
| <b>No transport means that they either produced it themselves or the ASF was brought to them (e.g. by a trader or neighbour, etc)</b> |
| Yes                                                                                                                                   |
| No                                                                                                                                    |
| <b>ASF2_3a. How long did you transport the ASF for (to take it home)?</b>                                                             |
| less than 5 minutes                                                                                                                   |
| 5 min to 15 min                                                                                                                       |
| 15 to 30 min                                                                                                                          |
| 30 min to 1 hour                                                                                                                      |
| 1hour to 2 hours                                                                                                                      |
| 2 hours to 3 hours                                                                                                                    |
| 3 hours                                                                                                                               |
| <b>ASF2_3b. How did you transport this [ASF] after you got it?</b>                                                                    |
| Chilled (e.g. on ice)                                                                                                                 |
| At ambient temperature                                                                                                                |
| Kept warm (e.g. thermos or thermal food container)                                                                                    |
| Other, specify                                                                                                                        |
| ASF2_3b_96x. Other specify                                                                                                            |
| <b>ASF2_4. Did you store this [ASF] before preparation?</b>                                                                           |
| Yes                                                                                                                                   |
| No                                                                                                                                    |
| <b>ASF2_4a. Was this [ASF] covered when you stored it before preparation?</b>                                                         |
| Yes                                                                                                                                   |
| No                                                                                                                                    |
| <b>ASF2_4b. Where did you store this [ASF] before preparation?</b>                                                                    |
| In a fridge                                                                                                                           |
| In a freezer                                                                                                                          |
| In a cool room (below 5 degrees Celsius)                                                                                              |
| In a room at room temperature                                                                                                         |
| Other, specify                                                                                                                        |
| ASF2_4b_96x. Specify, other                                                                                                           |
| <b>ASF2_4c. How long was this [ASF] stored before preparing?</b>                                                                      |
| minute                                                                                                                                |
| hour                                                                                                                                  |
| day                                                                                                                                   |

|                                                                                                                        |
|------------------------------------------------------------------------------------------------------------------------|
| total minutes                                                                                                          |
| total hours                                                                                                            |
| total day                                                                                                              |
| <b>ASF2_5. Did you wash this [ASF] before preparation?</b>                                                             |
| Yes                                                                                                                    |
| No                                                                                                                     |
| Not applicable                                                                                                         |
| <b>ASF2_6. If yes, why did you wash this [ASF]? (multiple answers)</b>                                                 |
| To remove visible dirt                                                                                                 |
| To remove visible blood                                                                                                |
| To make it safer                                                                                                       |
| Because it is a good practice                                                                                          |
| Other, specify                                                                                                         |
| <i>ASF2_6_96x. Specify, other</i>                                                                                      |
| <b>ASF2_7. Did you chop or cut this [ASF] product before preparation?</b>                                              |
| Yes                                                                                                                    |
| No                                                                                                                     |
| Not applicable                                                                                                         |
| <b>ASF2_8. If yes, which tool(s) did you use to chop or cut this [ASF]? (multiple answers)</b>                         |
| Cutting board                                                                                                          |
| Plate                                                                                                                  |
| Knife                                                                                                                  |
| Other, specify                                                                                                         |
| <i>ASF2_8_96x. Specify, other</i>                                                                                      |
| <b>ASF2_9. How did you prepare this food for the child?</b>                                                            |
| Grilling                                                                                                               |
| Baking                                                                                                                 |
| Frying                                                                                                                 |
| Boiling                                                                                                                |
| Stewing                                                                                                                |
| Simmering                                                                                                              |
| Fermenting                                                                                                             |
| Heating                                                                                                                |
| Mixed in with other ingredients without cooking the ASF (e.g. mixing yoghurt with fruit or adding dried fish to salad) |
| Made smaller portion (e.g. cutting in pieces or butting in a bowl), but did not cook or mix with other ingredients     |
| Other, specify                                                                                                         |
| <i>ASF2_9_96x. Specify, other</i>                                                                                      |
| <b>ASF2_10. For how long was this [ASF] cooked?</b>                                                                    |
| 1-5 min                                                                                                                |
| 5-15 min                                                                                                               |
| 15-30 min                                                                                                              |
| 30-60 min                                                                                                              |
| More than 1 hour                                                                                                       |
| <b>ASF2_11. After preparation, was this [ASF] stored before giving it to the child?</b>                                |
| Yes                                                                                                                    |
| No                                                                                                                     |

|                                                                                                     |
|-----------------------------------------------------------------------------------------------------|
| <b>ASF2_12. After preparation, how long was this [ASF] stored before giving it to the child?</b>    |
| 1-5 min                                                                                             |
| 5-15 min                                                                                            |
| 15-30 min                                                                                           |
| 30-60 min                                                                                           |
| More than 1 hour, less than 24h                                                                     |
| More than 1 day, less than 2 days                                                                   |
| More than 2 days                                                                                    |
| <b>ASF2_13. How did you store this [ASF] that had been prepared for your child?</b>                 |
| Thermos                                                                                             |
| Jug                                                                                                 |
| Plate or bowl (covered)                                                                             |
| Plate or bowl (uncovered)                                                                           |
| Cooking pot (covered)                                                                               |
| Cooking pot (uncovered)                                                                             |
| Other container (covered)                                                                           |
| Other container (uncovered)                                                                         |
| Other, specify                                                                                      |
| <i>ASF2_13_96x. Specify, other</i>                                                                  |
| <b>ASF2_14. Where did you store this [ASF]?</b>                                                     |
| In a fridge                                                                                         |
| In a freezer                                                                                        |
| In a cool room (below 5 degrees Celsius)                                                            |
| In a room at room temperature                                                                       |
| Other, specify                                                                                      |
| <i>ASF2_14_96x. Specify, other</i>                                                                  |
| <b>ASF3_1. What is the third priority ASF consumed by the child most recently? Select [ASF1]</b>    |
| Chicken                                                                                             |
| fish                                                                                                |
| beef                                                                                                |
| egg                                                                                                 |
| squid                                                                                               |
| meat ball                                                                                           |
| beef soup                                                                                           |
| chicken soup                                                                                        |
| duck egg                                                                                            |
| fish egg                                                                                            |
| None                                                                                                |
| <b>ASF3_2. How was this [ASF] packaged when you got it from the source? (select all that apply)</b> |
| No packaging                                                                                        |
| Sealed package                                                                                      |
| Washable container (plastic, glass, steel), open                                                    |
| Washable container (plastic, glass, steel), closed                                                  |
| Plastic bag                                                                                         |
| Newspaper                                                                                           |
| Other paper                                                                                         |
| Aluminium foil                                                                                      |

|                                                                                                                                       |
|---------------------------------------------------------------------------------------------------------------------------------------|
| Other foil                                                                                                                            |
| Container made from natural materials                                                                                                 |
| Other, specify                                                                                                                        |
| <i>ASF_2_96x Other: specify</i>                                                                                                       |
| <b>ASF3_3. Did you transport this [ASF] after you got it?</b>                                                                         |
| <b>No transport means that they either produced it themselves or the ASF was brought to them (e.g. by a trader or neighbour, etc)</b> |
| Yes                                                                                                                                   |
| No                                                                                                                                    |
| <b>ASF3_3a. How long did you transport the ASF for (to take it home)?</b>                                                             |
| less than 5 minutes                                                                                                                   |
| 5 min to 15 min                                                                                                                       |
| 15 to 30 min                                                                                                                          |
| 30 min to 1 hour                                                                                                                      |
| 1hour to 2 hours                                                                                                                      |
| 2 hours to 3 hours                                                                                                                    |
| 3 hours                                                                                                                               |
| <b>ASF3_3b. How did you transport this [ASF] after you got it?</b>                                                                    |
| Chilled (e.g. on ice)                                                                                                                 |
| At ambient temperature                                                                                                                |
| Kept warm (e.g. thermos or thermal food container)                                                                                    |
| Other, specify                                                                                                                        |
| <i>ASF3_3b_96x. Other, specify</i>                                                                                                    |
| <b>ASF3_4. Did you store this [ASF] before preparation?</b>                                                                           |
| Yes                                                                                                                                   |
| No                                                                                                                                    |
| <b>ASF3_4a. Was this [ASF] covered when you stored it before preparation?</b>                                                         |
| Yes                                                                                                                                   |
| No                                                                                                                                    |
| <b>ASF3_4b. Where did you store this [ASF] before preparation?</b>                                                                    |
| In a fridge                                                                                                                           |
| In a freezer                                                                                                                          |
| In a cool room (below 5 degrees Celsius)                                                                                              |
| In a room at room temperature                                                                                                         |
| Other, specify                                                                                                                        |
| <i>ASF3_4b_96x. Specify, other</i>                                                                                                    |
| <b>ASF3_4c. How long was this [ASF] stored before preparing?</b>                                                                      |
| minutes                                                                                                                               |
| hour                                                                                                                                  |
| day                                                                                                                                   |
| total minutes                                                                                                                         |
| total hours                                                                                                                           |
| total day                                                                                                                             |
| <b>ASF3_5. Did you wash this [ASF] before preparation?</b>                                                                            |
| Yes                                                                                                                                   |
| No                                                                                                                                    |
| Not applicable                                                                                                                        |
| <b>ASF3_6. If yes, why did you wash this [ASF]? (multiple answers)</b>                                                                |

|                                                                                                                        |
|------------------------------------------------------------------------------------------------------------------------|
| To remove visible dirt                                                                                                 |
| To remove visible blood                                                                                                |
| To make it safer                                                                                                       |
| Because it is a good practice                                                                                          |
| Other, specify                                                                                                         |
| <i>ASF3_6_96x. Specify, other</i>                                                                                      |
| <b>ASF3_7. Did you chop or cut this [ASF] product before preparation?</b>                                              |
| Yes                                                                                                                    |
| No                                                                                                                     |
| Not applicable                                                                                                         |
| <b>ASF3_8. If yes, which tool(s) did you use to chop or cut this [ASF]? (multiple answers)</b>                         |
| Cutting board                                                                                                          |
| Plate                                                                                                                  |
| Knife                                                                                                                  |
| Other, specify                                                                                                         |
| <i>ASF3_8_96x. Specify, other</i>                                                                                      |
| <b>ASF3_9. How did you prepare this food for the child?</b>                                                            |
| Grilling                                                                                                               |
| Baking                                                                                                                 |
| Frying                                                                                                                 |
| Boiling                                                                                                                |
| Stewing                                                                                                                |
| Simmering                                                                                                              |
| Fermenting                                                                                                             |
| Heating                                                                                                                |
| Mixed in with other ingredients without cooking the ASF (e.g. mixing yoghurt with fruit or adding dried fish to salad) |
| Made smaller portion (e.g. cutting in pieces or butting in a bowl), but did not cook or mix with other ingredients     |
| Other, specify                                                                                                         |
| <i>ASF3_9_96x. Specify, other</i>                                                                                      |
| <b>ASF3_10. For how long was this [ASF] cooked?</b>                                                                    |
| 1-5 min                                                                                                                |
| 5-15 min                                                                                                               |
| 15-30 min                                                                                                              |
| 30-60 min                                                                                                              |
| More than 1 hour                                                                                                       |
| <b>ASF3_11. After preparation, was this [ASF] stored before giving it to the child?</b>                                |
| Yes                                                                                                                    |
| No                                                                                                                     |
| <b>ASF3_12. After preparation, how long was this [ASF] stored before giving it to the child?</b>                       |
| 1-5 min                                                                                                                |
| 5-15 min                                                                                                               |
| 15-30 min                                                                                                              |
| 30-60 min                                                                                                              |
| More than 1 hour, less than 24h                                                                                        |
| More than 1 day, less than 2 days                                                                                      |
| More than 2 days                                                                                                       |

|                                                                                     |
|-------------------------------------------------------------------------------------|
| <b>ASF3_13. How did you store this [ASF] that had been prepared for your child?</b> |
| Thermos                                                                             |
| Jug                                                                                 |
| Plate or bowl (covered)                                                             |
| Plate or bowl (uncovered)                                                           |
| Cooking pot (covered)                                                               |
| Cooking pot (uncovered)                                                             |
| Other container (covered)                                                           |
| Other container (uncovered)                                                         |
| Other, specify                                                                      |
| <i>ASF3_13_96x. Specify, other</i>                                                  |
| <b>ASF3_14. Where did you store this [ASF]?</b>                                     |
| In a fridge                                                                         |
| In a freezer                                                                        |
| In a cool room (below 5 degrees Celsius)                                            |
| In a room at room temperature                                                       |
| Other, specify                                                                      |
| <i>ASF3_14_96x. Other, specify</i>                                                  |

## APPENDIX 2: WASH AND FOOD SAFETY SPOT CHECK

This checklist is filled by trained enumerators in the households at 3 different time points, to observe and record information about behaviours and facilities in relation to food safety and water and sanitation and hygiene practices at home. Data are collected in tablets on CommCare.

|                                                                                                    |
|----------------------------------------------------------------------------------------------------|
| # WATER SANITATION (SPOT CHECK) *(3 TIMES AT 2ND TRIMESTER, 3 & 9MO)*                              |
| <b>wash_1. What type of facility is the primary location for defecation?</b>                       |
| Flush toilet to piped sewer system                                                                 |
| Flush toilet to septic tank                                                                        |
| Flush toilet to pit                                                                                |
| Flush toilet to onsite, above ground, open pit                                                     |
| Pour flush toilet to piped sewer system                                                            |
| Pour flush toilet to septic tank                                                                   |
| Pour flush toilet to pit                                                                           |
| Pour flush toilet to onsite, above ground, open pit                                                |
| Pit latrine with concrete slab (not pour flush)                                                    |
| Pit latrine without slab (not pour flush)                                                          |
| Bucket                                                                                             |
| Bag                                                                                                |
| Open defecation (no facilities)                                                                    |
| Other:                                                                                             |
| Refused observation                                                                                |
| <i>wash_1_96x. Specify, other</i>                                                                  |
| <b>wash_2. Approximately how many meters is the toilet from the entrance of the household</b>      |
| <b>wash_3. For the following, please note if following indicators of functionality are present</b> |
| <b>wash_3_1. Is the pan working (not broken)</b>                                                   |
| yes                                                                                                |
| no                                                                                                 |
| <b>wash_3_2. Are there leaves or rubbish blocking the pan?</b>                                     |
| yes                                                                                                |
| no                                                                                                 |
| <b>wash_3_3. Is there standing water in the pan?</b>                                               |
| yes                                                                                                |
| no                                                                                                 |
| <b>wash_3_4. Is there a cover over the pit?</b>                                                    |
| yes                                                                                                |
| no                                                                                                 |
| <b>wash_3_5. Are there one or two pits?</b>                                                        |
| One                                                                                                |
| Two                                                                                                |
| More                                                                                               |
| <b>wash_3_6. Is there a cover on all the pits?</b>                                                 |
| No                                                                                                 |
| Partial (only to one pit)                                                                          |
| Yes, to more than one pit                                                                          |
| <b>wash_3_7. Are there flies?</b>                                                                  |

|                                                                                                                                                                                              |
|----------------------------------------------------------------------------------------------------------------------------------------------------------------------------------------------|
| None                                                                                                                                                                                         |
| Some                                                                                                                                                                                         |
| Many                                                                                                                                                                                         |
| <b>wash_4. Can you please show me where members of this household most often wash their hands?</b>                                                                                           |
| Fixed facility (sink/basin)... in dwelling                                                                                                                                                   |
| Fixed facility....in yard                                                                                                                                                                    |
| Mobile object (bucket / jug)                                                                                                                                                                 |
| No handwashing place in dwelling                                                                                                                                                             |
| Refused observation                                                                                                                                                                          |
| <b>wash_5. Is there water available at this location?</b>                                                                                                                                    |
| Yes                                                                                                                                                                                          |
| No                                                                                                                                                                                           |
| <b>wash_6. Is soap available at this location? (Soap includes bar soap, liquid soap, powder detergent, and soapy water but does not include ash, soil, sand or other handwashing agents)</b> |
| Yes                                                                                                                                                                                          |
| No                                                                                                                                                                                           |
| <b>wash_7. Is the dedicated location located near (within 5 steps) the primary cooking location?</b>                                                                                         |
| Yes                                                                                                                                                                                          |
| No                                                                                                                                                                                           |
| <b>wash_8. Is the dedicated location located near (within 5 steps) the latrine/toilet</b>                                                                                                    |
| Yes                                                                                                                                                                                          |
| No                                                                                                                                                                                           |
| <b>wash_9. Are there animals located in or around the household? (select all)</b>                                                                                                            |
| No animals visible                                                                                                                                                                           |
| In the cooking area (outside house)                                                                                                                                                          |
| In the cooking area (inside house)                                                                                                                                                           |
| In the food storing area (outside house)                                                                                                                                                     |
| In the food storing area (inside house)                                                                                                                                                      |
| In other areas of the house that are not cooking or food storing areas                                                                                                                       |
| <b>wash_10. What type of animals (select all)</b>                                                                                                                                            |
| Chickens                                                                                                                                                                                     |
| Ducks                                                                                                                                                                                        |
| Other birds                                                                                                                                                                                  |
| Dog                                                                                                                                                                                          |
| Cat                                                                                                                                                                                          |
| Goat                                                                                                                                                                                         |
| Sheep                                                                                                                                                                                        |
| Pig                                                                                                                                                                                          |
| Cow                                                                                                                                                                                          |
| Wild animals                                                                                                                                                                                 |
| Rodents                                                                                                                                                                                      |
| Other animal                                                                                                                                                                                 |
| <i>wash_10_96x. Other, specify</i>                                                                                                                                                           |
| <b>wash_11. Are there animal feces located in or around the household? (select all)</b>                                                                                                      |
| No animal feces visible                                                                                                                                                                      |
| In the cooking area (outside house)                                                                                                                                                          |
| In the cooking area (inside house)                                                                                                                                                           |
| In the food storing area (outside house)                                                                                                                                                     |

|                                                                                                                                                                                              |
|----------------------------------------------------------------------------------------------------------------------------------------------------------------------------------------------|
| In the food storing area (inside house)                                                                                                                                                      |
| In other areas of the house that are not cooking or food storing areas                                                                                                                       |
| In the yard / courtyard                                                                                                                                                                      |
|                                                                                                                                                                                              |
| # FOOD SAFETY QUESTIONNAIRE *(1 TIME: AT 6 MO)*                                                                                                                                              |
| HAND WASHING                                                                                                                                                                                 |
| <b>spot_1. Can you please show me where members of this household most often wash their hands after using the toilets?</b>                                                                   |
| Fixed facility (sink/basin)... in dwelling                                                                                                                                                   |
| Fixed facility...in yard                                                                                                                                                                     |
| Mobile object (bucket / jug)                                                                                                                                                                 |
| No handwashing place in dwelling                                                                                                                                                             |
| Refused observation                                                                                                                                                                          |
| <b>spot_2. Is there water available at this location?</b>                                                                                                                                    |
| Yes                                                                                                                                                                                          |
| No                                                                                                                                                                                           |
| <b>spot_3. Is soap available at this location? (Soap includes bar soap, liquid soap, powder detergent, and soapy water but does not include ash, soil, sand or other handwashing agents)</b> |
| Yes                                                                                                                                                                                          |
| No                                                                                                                                                                                           |
| <b>spot_4. Is the dedicated location located near (within 5 steps) the primary cooking location?</b>                                                                                         |
| Yes                                                                                                                                                                                          |
| No                                                                                                                                                                                           |
| <b>spot_5. Is the dedicated location located near (within 5 steps) the latrine/toilet</b>                                                                                                    |
| Yes                                                                                                                                                                                          |
| No                                                                                                                                                                                           |
| <b>spot_6. Can you show me where members of this household most often wash their hands before eating or preparing food?</b>                                                                  |
| Fixed facility (sink/basin)... in dwelling                                                                                                                                                   |
| Fixed facility...in yard                                                                                                                                                                     |
| Mobile object (bucket / jug)                                                                                                                                                                 |
| No handwashing place in dwelling                                                                                                                                                             |
| Refused observation                                                                                                                                                                          |
| Same as after toilet                                                                                                                                                                         |
| <b>spot_7. Is there water available at this location?</b>                                                                                                                                    |
| Yes                                                                                                                                                                                          |
| No                                                                                                                                                                                           |
| <b>spot_8. Is soap available at this location? (Soap includes bar soap, liquid soap, powder detergent, and soapy water but does not include ash, soil, sand or other handwashing agents)</b> |
| Yes                                                                                                                                                                                          |
| No                                                                                                                                                                                           |
| <b>spot_9. Is the dedicated location located near (within 5 steps) the primary cooking location?</b>                                                                                         |
| Yes                                                                                                                                                                                          |
| No                                                                                                                                                                                           |
| <b>spot_10. Is the dedicated location located near (within 5 steps) the latrine/toilet</b>                                                                                                   |
| Yes                                                                                                                                                                                          |
| No                                                                                                                                                                                           |
| <b>spot_11. Do you see animals in or around the household? (select all)</b>                                                                                                                  |

|                                                                                                                                                                           |
|---------------------------------------------------------------------------------------------------------------------------------------------------------------------------|
| No animals visible                                                                                                                                                        |
| In the cooking area (outside house)                                                                                                                                       |
| In the cooking area (inside house)                                                                                                                                        |
| In the food storing area (outside house)                                                                                                                                  |
| In the food storing area (inside house)                                                                                                                                   |
| In other areas of the house that are not cooking or food storing areas                                                                                                    |
| <b>spot_12. What type of animals (select all)</b>                                                                                                                         |
| Chickens                                                                                                                                                                  |
| Ducks                                                                                                                                                                     |
| Other birds                                                                                                                                                               |
| Dog                                                                                                                                                                       |
| Cat                                                                                                                                                                       |
| Goat                                                                                                                                                                      |
| Sheep                                                                                                                                                                     |
| Pig                                                                                                                                                                       |
| Cow                                                                                                                                                                       |
| Wild animals                                                                                                                                                              |
| Rodents                                                                                                                                                                   |
| Other animal                                                                                                                                                              |
| <i>spot_12_96x. Specify other</i>                                                                                                                                         |
| <b>spot_13. Is it possible for the child to be in contact with these animals (e.g. if they are unrestrained or the child can access an enclosure)?</b>                    |
| Yes                                                                                                                                                                       |
| No                                                                                                                                                                        |
| <b>spot_14. Is it possible for these animals to be in contact with food (e.g. if animals are unrestrained)</b>                                                            |
| Yes                                                                                                                                                                       |
| No                                                                                                                                                                        |
| <b>spot_15. Are there visible animal feces located in or around the household? (select all)</b>                                                                           |
| No animal feces visible                                                                                                                                                   |
| In the cooking area (outside house)                                                                                                                                       |
| In the cooking are (inside house)                                                                                                                                         |
| In the food storing area (outside house)                                                                                                                                  |
| In the food storing area (inside house)                                                                                                                                   |
| In other areas of the house that are not cooking or food storing areas                                                                                                    |
| In the yard / courtyard                                                                                                                                                   |
| In the animal enclosure (e.g. chicken coop)                                                                                                                               |
| <b>spot_16. Is it possible for the child to be in contact with these faeces (e.g. because they are in areas where the child is or the child can access an enclosure)?</b> |
| Yes                                                                                                                                                                       |
| No                                                                                                                                                                        |
| <b>spot_17. Is it possible that food gets in contact with these faeces?</b>                                                                                               |
| Yes                                                                                                                                                                       |
| No                                                                                                                                                                        |
| <b>safe_1. Is there a functioning refrigerator?</b>                                                                                                                       |
| Yes                                                                                                                                                                       |
| No                                                                                                                                                                        |
| <b>safe_2. Is there a functioning freezer?</b>                                                                                                                            |
| Yes                                                                                                                                                                       |

|                                                                                                                                                                                               |
|-----------------------------------------------------------------------------------------------------------------------------------------------------------------------------------------------|
| No                                                                                                                                                                                            |
| <b>safe_3. Is there any visible, stored [ASF] not protected from the environment?</b>                                                                                                         |
| Yes                                                                                                                                                                                           |
| No                                                                                                                                                                                            |
| <b>safe_4. Is it [ASF] in contact with other food products?</b>                                                                                                                               |
| Yes                                                                                                                                                                                           |
| No                                                                                                                                                                                            |
| <b>safe_5. Is the area where this [ASF] is kept protected from animals and flies?</b>                                                                                                         |
| Yes                                                                                                                                                                                           |
| No                                                                                                                                                                                            |
| <b>safe_6. Is there a kitchen area (a dedicated food preparation area)?</b>                                                                                                                   |
| Yes                                                                                                                                                                                           |
| No                                                                                                                                                                                            |
| <b>safe_6a. Is the kitchen area free from pest animals (i.e. birds, flies, rats)</b>                                                                                                          |
| Yes                                                                                                                                                                                           |
| No                                                                                                                                                                                            |
| <b>safe_6b. Are there anti-pest measures in place in the kitchen area? e.g. nets, traps, insect killers</b>                                                                                   |
| Yes                                                                                                                                                                                           |
| No                                                                                                                                                                                            |
| <b>safe_6c. Is the kitchen area free of visible dirt?</b>                                                                                                                                     |
| Yes                                                                                                                                                                                           |
| No                                                                                                                                                                                            |
| <b>safe_6d. Are cooking utensils clean?</b>                                                                                                                                                   |
| Yes                                                                                                                                                                                           |
| No                                                                                                                                                                                            |
| <b>safe_6e. Is the kitchen area easy to clean (e.g. tiles)?</b>                                                                                                                               |
| Yes                                                                                                                                                                                           |
| No                                                                                                                                                                                            |
| <b>safe_6f. Does the kitchen area have access to running water?</b>                                                                                                                           |
| Yes                                                                                                                                                                                           |
| No                                                                                                                                                                                            |
| <b>safe_6g. If there is no access to running water, is there stored water in the area where food is being prepared?</b>                                                                       |
| Yes, there is water in a container with a lid/top on it                                                                                                                                       |
| Yes, there is water in an open container                                                                                                                                                      |
| No, there is no water                                                                                                                                                                         |
| <b>safe_6h. Is soap available at this location? (Soap includes bar soap, liquid soap, powder detergent, and soapy water but does not include ash, soil, sand or other handwashing agents)</b> |
| Yes                                                                                                                                                                                           |
| No                                                                                                                                                                                            |
| <b>safe_7. Is there a food storage area?</b>                                                                                                                                                  |
| Yes                                                                                                                                                                                           |
| No                                                                                                                                                                                            |
| <b>safe_7a. In the food storage area, is the storage equipment made of material that is easy to clean (e.g. metal, plastic)?</b>                                                              |
| Yes                                                                                                                                                                                           |
| No                                                                                                                                                                                            |
| <b>safe_7b. Is the food storage area free from pest animals (i.e. birds, flies, rats)</b>                                                                                                     |

|                                                                                                                  |
|------------------------------------------------------------------------------------------------------------------|
| Yes                                                                                                              |
| No                                                                                                               |
| <b>safe_7c. Are there anti-pest measures in place in the food storage area? e.g. nets, traps, insect killers</b> |
| Yes                                                                                                              |
| No                                                                                                               |
| <b>safe_7d. Is the food storage area free of visible dirt?</b>                                                   |
| Yes                                                                                                              |
| No                                                                                                               |
| <b>safe_7e. Is the food storage area easy to clean (e.g. tiles)?</b>                                             |
| Yes                                                                                                              |
| No                                                                                                               |
| <b>safe_8. Is there a facility to dispose of food waste?</b>                                                     |
| No                                                                                                               |
| In the cooking area (outside house)                                                                              |
| In the cooking area (inside house)                                                                               |
| In the food storing area (outside house)                                                                         |
| In the food storing area (inside house)                                                                          |
| Outside the house remove from cooking or food storing areas                                                      |
| Removed from the household                                                                                       |
| <b>safe_9. Are the knife and chopping board used to cut vegetables and fruits are clean?</b>                     |
| Yes                                                                                                              |
| No                                                                                                               |
| <b>safe_10. Are the nails of the food handler trimmed?</b>                                                       |
| Yes                                                                                                              |
| No                                                                                                               |



**Direct observation**

Household ID: \_\_\_\_\_

|                                        |                   |                       |
|----------------------------------------|-------------------|-----------------------|
|                                        | <b>Yes (tick)</b> | <b>Date: dd/mm/yy</b> |
| <b>Checked by supervisor: (code)</b>   |                   |                       |
| <b>Checked by co-ordinator: (code)</b> |                   |                       |
| <b>Data entry completed: (code)</b>    |                   |                       |

| Activity                                                   | :00                    |    |    |    | :00 |    |    |    | :00 |    |    |    | :00 |    |    |    | Pilot notes |
|------------------------------------------------------------|------------------------|----|----|----|-----|----|----|----|-----|----|----|----|-----|----|----|----|-------------|
|                                                            | a                      | b  | c  | d  | e   | f  | g  | h  | i   | j  | k  | l  | m   | n  | o  | p  |             |
|                                                            | 00                     | 15 | 30 | 45 | 00  | 15 | 30 | 45 | 00  | 15 | 30 | 45 | 00  | 15 | 30 | 45 |             |
| <b>1. Child Activities</b>                                 |                        |    |    |    |     |    |    |    |     |    |    |    |     |    |    |    |             |
| 1.1 Sleeping                                               |                        |    |    |    |     |    |    |    |     |    |    |    |     |    |    |    |             |
| 1.2 Caretaker change                                       |                        |    |    |    |     |    |    |    |     |    |    |    |     |    |    |    |             |
| 1.3 Child being cared for by other children                |                        |    |    |    |     |    |    |    |     |    |    |    |     |    |    |    |             |
| <b>2. Child feces</b>                                      |                        |    |    |    |     |    |    |    |     |    |    |    |     |    |    |    |             |
| 2.1 Child nappy or diaper is changed                       |                        |    |    |    |     |    |    |    |     |    |    |    |     |    |    |    |             |
| 2.2 Child defecates on floor                               |                        |    |    |    |     |    |    |    |     |    |    |    |     |    |    |    |             |
| 2.3 Child defecates in potty                               |                        |    |    |    |     |    |    |    |     |    |    |    |     |    |    |    |             |
| 2.4 Child feces disposed in toilet                         |                        |    |    |    |     |    |    |    |     |    |    |    |     |    |    |    |             |
| 2.5 Child feces disposed in bush / ditch                   |                        |    |    |    |     |    |    |    |     |    |    |    |     |    |    |    |             |
| <b>3. Food preparation</b>                                 |                        |    |    |    |     |    |    |    |     |    |    |    |     |    |    |    |             |
| 3.1 Fruit or vegetable washed                              |                        |    |    |    |     |    |    |    |     |    |    |    |     |    |    |    |             |
| 3.2 Food preparation surface rinsed (specify surface type) |                        |    |    |    |     |    |    |    |     |    |    |    |     |    |    |    |             |
| 3.3 Food preparation surface washed (specify surface type) |                        |    |    |    |     |    |    |    |     |    |    |    |     |    |    |    |             |
| 3.4 Utensils rinsed                                        |                        |    |    |    |     |    |    |    |     |    |    |    |     |    |    |    |             |
| 3.5 Utensils washed                                        |                        |    |    |    |     |    |    |    |     |    |    |    |     |    |    |    |             |
| 3.6 Plates / bowls/ cups rinsed                            |                        |    |    |    |     |    |    |    |     |    |    |    |     |    |    |    |             |
| 3.7 Plates / bowls/cups washed                             |                        |    |    |    |     |    |    |    |     |    |    |    |     |    |    |    |             |
| 3.8 Child bottle rinsed                                    |                        |    |    |    |     |    |    |    |     |    |    |    |     |    |    |    |             |
| 3.9 Child bottle cleaned                                   |                        |    |    |    |     |    |    |    |     |    |    |    |     |    |    |    |             |
| <b>4. Food cooking</b>                                     |                        |    |    |    |     |    |    |    |     |    |    |    |     |    |    |    |             |
|                                                            | Specify from section 3 |    |    |    |     |    |    |    |     |    |    |    |     |    |    |    |             |

**Direct observation**

Household ID: \_\_\_\_\_

| Activity                                                        | :00 |    |    |    | :00 |    |    |    | :00 |    |    |    | :00                      |    |    |    | Pilot notes |
|-----------------------------------------------------------------|-----|----|----|----|-----|----|----|----|-----|----|----|----|--------------------------|----|----|----|-------------|
|                                                                 | a   | b  | c  | d  | e   | f  | g  | h  | i   | j  | k  | l  | m                        | n  | o  | p  |             |
|                                                                 | 00  | 15 | 30 | 45 | 00  | 15 | 30 | 45 | 00  | 15 | 30 | 45 | 00                       | 15 | 30 | 45 |             |
|                                                                 |     |    |    |    |     |    |    |    |     |    |    |    | Specify type in comments |    |    |    |             |
| 4.1 Food fried (ASF / Fruit Veg / Other)                        |     |    |    |    |     |    |    |    |     |    |    |    |                          |    |    |    |             |
| 4.2 Food dried (ASF / Fruit Veg / other)                        |     |    |    |    |     |    |    |    |     |    |    |    |                          |    |    |    |             |
| 4.3 Food roasted (ASF / Fruit Veg / other)                      |     |    |    |    |     |    |    |    |     |    |    |    |                          |    |    |    |             |
| 4.4 Food heated in pot, no boiled (ASF/ Fruit Veg / other)      |     |    |    |    |     |    |    |    |     |    |    |    |                          |    |    |    |             |
| 4.5 Food boiled (ASF / Fruit Veg/ other)                        |     |    |    |    |     |    |    |    |     |    |    |    |                          |    |    |    |             |
| 4.6 Food steamed (ASF / Fruit Veg / Other)                      |     |    |    |    |     |    |    |    |     |    |    |    |                          |    |    |    |             |
| 4.7 Food arrives processed (ASF / Fruit Veg / Other)            |     |    |    |    |     |    |    |    |     |    |    |    |                          |    |    |    |             |
| 4.8 Food added raw / uncooked to dish (ASF / Fruit Veg / Other) |     |    |    |    |     |    |    |    |     |    |    |    |                          |    |    |    |             |
| 5. Food handling                                                |     |    |    |    |     |    |    |    |     |    |    |    | Specify from section 4   |    |    |    |             |
| 5.1 Cooked food served immediately to child                     |     |    |    |    |     |    |    |    |     |    |    |    |                          |    |    |    |             |
| 5.2 Cooked food left at room temp / open                        |     |    |    |    |     |    |    |    |     |    |    |    |                          |    |    |    |             |
| 5.3 Cooked food placed in cabinet / cupboard                    |     |    |    |    |     |    |    |    |     |    |    |    |                          |    |    |    |             |
| 5.4 Cooked food placed in fridge                                |     |    |    |    |     |    |    |    |     |    |    |    |                          |    |    |    |             |
| 5.5 Cooked food covered (loosely)                               |     |    |    |    |     |    |    |    |     |    |    |    |                          |    |    |    |             |
| 5.6 Cooked food covered (sealed)                                |     |    |    |    |     |    |    |    |     |    |    |    |                          |    |    |    |             |
| 6. Child feeding                                                |     |    |    |    |     |    |    |    |     |    |    |    | Specify from section 4   |    |    |    |             |
| 6.1 Child breastfed                                             |     |    |    |    |     |    |    |    |     |    |    |    |                          |    |    |    |             |
| 6.2 Child given food that was stored                            |     |    |    |    |     |    |    |    |     |    |    |    |                          |    |    |    |             |
| 6.3 Child given milk                                            |     |    |    |    |     |    |    |    |     |    |    |    |                          |    |    |    |             |
| 6.4 Child given water                                           |     |    |    |    |     |    |    |    |     |    |    |    |                          |    |    |    |             |
| 6.5 Flies on food given to child                                |     |    |    |    |     |    |    |    |     |    |    |    |                          |    |    |    |             |
| 6.6 Child fed by caregivers hand                                |     |    |    |    |     |    |    |    |     |    |    |    |                          |    |    |    |             |
| 6.6 Child eating using child's hand                             |     |    |    |    |     |    |    |    |     |    |    |    |                          |    |    |    |             |
| 6.7 Child fed/eating using utensils (e.g. spoon)                |     |    |    |    |     |    |    |    |     |    |    |    |                          |    |    |    |             |
| 7. Floor contact                                                |     |    |    |    |     |    |    |    |     |    |    |    |                          |    |    |    |             |

**Direct observation**

Household ID: \_\_\_\_\_

| Activity                                                                          | :00 |    |    |    | :00 |    |    |    | :00 |    |    |    | :00                                                                                                    |    |    |    | Pilot notes |
|-----------------------------------------------------------------------------------|-----|----|----|----|-----|----|----|----|-----|----|----|----|--------------------------------------------------------------------------------------------------------|----|----|----|-------------|
|                                                                                   | a   | b  | c  | d  | e   | f  | g  | h  | i   | j  | k  | l  | m                                                                                                      | n  | o  | p  |             |
|                                                                                   | 00  | 15 | 30 | 45 | 00  | 15 | 30 | 45 | 00  | 15 | 30 | 45 | 00                                                                                                     | 15 | 30 | 45 |             |
| 7.1 Child hand contact with floor                                                 |     |    |    |    |     |    |    |    |     |    |    |    |                                                                                                        |    |    |    |             |
| 7.2 Child hand contact with dirt                                                  |     |    |    |    |     |    |    |    |     |    |    |    |                                                                                                        |    |    |    |             |
| 7.3 Child eats dirt / soil                                                        |     |    |    |    |     |    |    |    |     |    |    |    |                                                                                                        |    |    |    |             |
| 7.4 Child places objects from the floor in their mouths                           |     |    |    |    |     |    |    |    |     |    |    |    |                                                                                                        |    |    |    |             |
| 7.5 Child places hands that have been in contact with the floor in mouth          |     |    |    |    |     |    |    |    |     |    |    |    |                                                                                                        |    |    |    |             |
| <b>8. Animal contact</b>                                                          |     |    |    |    |     |    |    |    |     |    |    |    | Write down the animal (chickens, ducks, other birds, goats, sheep, pigs, cow, dog, cat, other/specify) |    |    |    |             |
| 8.1 Caretaker hand contact with animals                                           |     |    |    |    |     |    |    |    |     |    |    |    |                                                                                                        |    |    |    |             |
| 8.2 Caretaker hand contact with animal feces                                      |     |    |    |    |     |    |    |    |     |    |    |    |                                                                                                        |    |    |    |             |
| 8.3 Child hand contact with animals                                               |     |    |    |    |     |    |    |    |     |    |    |    |                                                                                                        |    |    |    |             |
| 8.4 Child hand contact with animal feces                                          |     |    |    |    |     |    |    |    |     |    |    |    |                                                                                                        |    |    |    |             |
| <b>9. Toilet use</b>                                                              |     |    |    |    |     |    |    |    |     |    |    |    |                                                                                                        |    |    |    |             |
| 9.1 Primary caretaker uses toilet                                                 |     |    |    |    |     |    |    |    |     |    |    |    |                                                                                                        |    |    |    |             |
| 9.2 Primary caretaker goes for open defecation                                    |     |    |    |    |     |    |    |    |     |    |    |    |                                                                                                        |    |    |    |             |
| <b>10. Domestic cleaning</b>                                                      |     |    |    |    |     |    |    |    |     |    |    |    |                                                                                                        |    |    |    |             |
| 10.1 Caretakers washes clothes                                                    |     |    |    |    |     |    |    |    |     |    |    |    |                                                                                                        |    |    |    |             |
| 10.2 Caretaker / other household member sweeps                                    |     |    |    |    |     |    |    |    |     |    |    |    |                                                                                                        |    |    |    |             |
| 10.3 Caretaker / other household members cleans floors (with disinfectant / soap) |     |    |    |    |     |    |    |    |     |    |    |    |                                                                                                        |    |    |    |             |
| 10.3 Caretakers handles garbage                                                   |     |    |    |    |     |    |    |    |     |    |    |    |                                                                                                        |    |    |    |             |
| <b>11. Handwashing / Facewashing</b>                                              |     |    |    |    |     |    |    |    |     |    |    |    |                                                                                                        |    |    |    |             |
| 11.1 Caretaker rinses hands – water only                                          |     |    |    |    |     |    |    |    |     |    |    |    |                                                                                                        |    |    |    |             |
| 11.2 Caretaker washes hands – soap used                                           |     |    |    |    |     |    |    |    |     |    |    |    |                                                                                                        |    |    |    |             |
| 11.3 Child's hands rinsed – water only                                            |     |    |    |    |     |    |    |    |     |    |    |    |                                                                                                        |    |    |    |             |
| 11.4 Child's hands washed – soap used                                             |     |    |    |    |     |    |    |    |     |    |    |    |                                                                                                        |    |    |    |             |
| 11.5 Child's face wiped or rinses                                                 |     |    |    |    |     |    |    |    |     |    |    |    |                                                                                                        |    |    |    |             |
| 11.6 Child's face cleaned                                                         |     |    |    |    |     |    |    |    |     |    |    |    |                                                                                                        |    |    |    |             |
| 11.7 Caretaker bathes                                                             |     |    |    |    |     |    |    |    |     |    |    |    |                                                                                                        |    |    |    |             |

**Direct observation**

Household ID: \_\_\_\_\_

| Activity          | :00 |    |    |    | :00 |    |    |    | :00 |    |    |    | :00 |    |    |    | Pilot notes |
|-------------------|-----|----|----|----|-----|----|----|----|-----|----|----|----|-----|----|----|----|-------------|
|                   | a   | b  | c  | d  | e   | f  | g  | h  | i   | j  | k  | l  | m   | n  | o  | p  |             |
|                   | 00  | 15 | 30 | 45 | 00  | 15 | 30 | 45 | 00  | 15 | 30 | 45 | 00  | 15 | 30 | 45 |             |
| 11.8 Child bathed |     |    |    |    |     |    |    |    |     |    |    |    |     |    |    |    |             |

**Direct observation**

Household ID: \_\_\_\_\_

**Data log Table. Food Sample**

HH ID: \_\_\_\_\_

Timepoint: 9 month/ 12 month/ 18 month

Date (DD/MMM/YY): \_\_\_\_\_

Collection time (24 hour clock, HH:MM): --- \_\_\_\_\_

|                                                                                                                                                    |  |
|----------------------------------------------------------------------------------------------------------------------------------------------------|--|
| Collection period: During feeding <input type="checkbox"/> Directly after feeding <input type="checkbox"/> Before feeding <input type="checkbox"/> |  |
| Food:                                                                                                                                              |  |
| Total sample weight                                                                                                                                |  |
| Ingredients:                                                                                                                                       |  |
| Preparation method:                                                                                                                                |  |
| Notes:                                                                                                                                             |  |

**Direct observation**

Household ID: \_\_\_\_\_

**Data log Table. Water Sample**

HH ID: \_\_\_\_\_

Timepoint: 9 month/ 12 month/ 18 month

Date (DD/MM/YY): \_\_\_\_\_

Collection time (24 hour clock, HH:MM): --- \_\_\_\_\_

|                                                                                                                                                                                                                                                                                                                                   |  |
|-----------------------------------------------------------------------------------------------------------------------------------------------------------------------------------------------------------------------------------------------------------------------------------------------------------------------------------|--|
| Has the water been treated with chlorine/aquatabs or is from the municipal system?<br>Yes <input type="checkbox"/> (collect water in a small 100 mL whirlpak bag with sodium thiosulfate tablets + collect further water in a 50mL centrifuge tube)<br>No <input type="checkbox"/> (collect water in a large 250 mL whirlpak bag) |  |
| Notes:                                                                                                                                                                                                                                                                                                                            |  |

**Direct observation**

Household ID: \_\_\_\_\_

**Data log Table. Surface Sample**

Timepoint: 9 month/ 12 month/ 18 month

HH ID: \_\_\_\_\_

Date (DD/MMM/YY): \_\_\_\_\_

Collection time (24 hour clock, HH:MM): --- \_\_\_\_\_

|                                                                                                                                                                      |  |
|----------------------------------------------------------------------------------------------------------------------------------------------------------------------|--|
| Where is the child's food prepared [the surface where foods and utensils are placed during preparation and/or where foods cut up or otherwise processed in any way]? |  |
| Notes:                                                                                                                                                               |  |
